# Supplementary material
Source: Research Square preprint supplement (doi:10.21203/rs.3.rs-9834150/v1)
Supplement: Supplementary file 1 [file 2c2be19aa1e5bba1c8061cd4.pdf]

# Supplementary materials

## *Physicochemical Characterization and In Vitro Biological Evaluation of TPGS-Stabilized Cationic Nanoliposomes for 8-Bromo-6-Chloroflavone Delivery*

Anita Dudek<sup>1\*</sup>, Aleksandra Pawlak<sup>2,3,4</sup>, Paulina Strugała-Danak<sup>1</sup>,  
Dominika Benkowska-Biernacka<sup>5</sup>, Martyna Perz<sup>6,7</sup>, Agnieszka  
Krawczyk-Łebek<sup>7</sup>, Edyta Kostrzewa-Susłow<sup>7</sup>, Hanna Pruchnik<sup>1</sup>

| Content                                                                                                                                                                                                  | Page number |
|----------------------------------------------------------------------------------------------------------------------------------------------------------------------------------------------------------|-------------|
| <b>Tab.S1</b> Hydrodynamic diameter, polydispersity index and zeta potential of BrCl-F-Lipo measured after 48 h, 14 days and 30 days.                                                                    | 3           |
| <b>Tab.S2</b> Hydrodynamic diameter, polydispersity index and zeta potential of Lipo measured after 48 h, 14 days and 30 days.                                                                           | 3           |
| <b>Fig.S1</b> Hydrodynamic diameter, polydispersity index (PDI) and zeta potential ( $\zeta$ -potential) of BrCl-F-Lipo and Lipo measured after 48 h, 14 days and 30 days – full statistical comparison. | 4           |
| <b>Fig. S2</b> Emission spectra of HSA in the presence of various concentrations and Stern-Volmer plots of $F_0/F$ against concentration of BrCl-F-Lipo, Lipo and BrCl-F at 295 K.                       | 5           |
| <b>Fig. S3</b> Emission spectra of HSA in the presence of various concentrations and Stern-Volmer plots of $F_0/F$ against concentration of BrCl-F-Lipo, Lipo and BrCl-F at 300 K.                       | 6           |
| <b>Fig. S4</b> Emission spectra of HSA in the presence of various concentrations and Stern-Volmer plots of $F_0/F$ against concentration of BrCl-F-Lipo, Lipo and BrCl-F at 305 K.                       | 7           |
| <b>Fig.S5</b> The plots of $\log(F_0 - F)/F$ versus $\log[c]$ of BrCl-F-Lipo, Lipo and BrCl-F at 295 K.                                                                                                  | 8           |
| <b>Fig.S6</b> The plots of $\log(F_0 - F)/F$ versus $\log[c]$ of BrCl-F-Lipo, Lipo and BrCl-F at 300 K.                                                                                                  | 8           |
| <b>Fig.S7</b> The plots of $\log(F_0 - F)/F$ versus $\log[c]$ of BrCl-F-Lipo, Lipo and BrCl-F at 305 K.                                                                                                  | 8           |
| <b>Fig.S8</b> The plots of $\log(F_0 - F)/F$ versus $\log[c]$ of BrCl-F-Lipo, Lipo and BrCl-F at 310 K.                                                                                                  | 9           |
| <b>Fig.S9</b> Effects of BrCl-F-Lipo, Lipo) and BrCl-F on metabolic activity in CLBL-1, CLB70 and MDCK cell lines – full statistical comparison.                                                         | 9           |
| <b>Fig. S10</b> Percentage of hemolysis after 1 h and 24 h in the presence of the BrCl-F-Lipo, Lipo and BrCl-F – full statistical comparison.                                                            | 10          |

| <i>Time of storage</i> | <i>D<sub>h</sub> (nm)</i> | <i>PDI</i>    | <i>ζ-potential (mV)</i> |
|------------------------|---------------------------|---------------|-------------------------|
| <i>48 h</i>            | 125.06 ± 1.69             | 0.153 ± 0.009 | +28.14 ± 3.32           |
| <i>14 days</i>         | 138.24 ± 8.36             | 0.16 ± 0.05   | +41.8 ± 4.15            |
| <i>30 days</i>         | 202.86 ± 11.31            | 0.26 ± 0.04   | +29.27 ± 3.72           |

**Tab.S1** Hydrodynamic diameter, polydispersity index and zeta potential of BrCl-F-Lipo measured after 48 h, 14 days and 30 days. Mean ± standard deviation (n=5).

| <i>Time of storage</i> | <i>D<sub>h</sub> (nm)</i> | <i>PDI</i>  | <i>ζ-potential (mV)</i> |
|------------------------|---------------------------|-------------|-------------------------|
| <i>48 h</i>            | 141.04 ± 3.30             | 0.15 ± 0.02 | +47.32 ± 3.13           |
| <i>14 days</i>         | 128.1 ± 8.16              | 0.20 ± 0.01 | +42.8 ± 4.99            |
| <i>30 days</i>         | 164.72 ± 1.32             | 0.47 ± 0.01 | +23.03 ± 6.00           |

**Tab.S2** Hydrodynamic diameter, polydispersity index and zeta potential of Lipo measured after 48 h, 14 days and 30 days. Mean ± standard deviation (n=5).

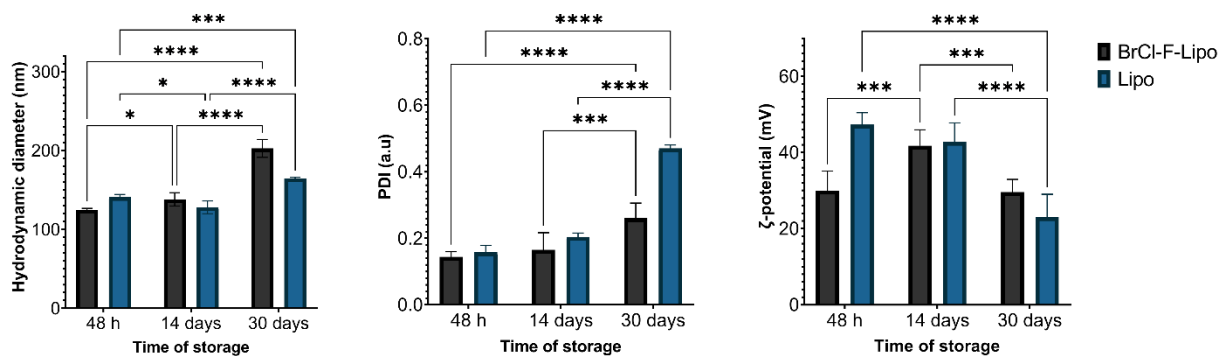

**Fig.S1** Hydrodynamic diameter, polydispersity index (PDI) and zeta potential ( $\zeta$ -potential) of BrCl-F-Lipo and Lipo measured after 48 h, 14 days and 30 days. Error bars represent standard deviation (n = 5). Statistical significance vs. control: \*p < 0.05; \*\*p < 0.01; \*\*\*p < 0.001; \*\*\*\*p < 0.0001.

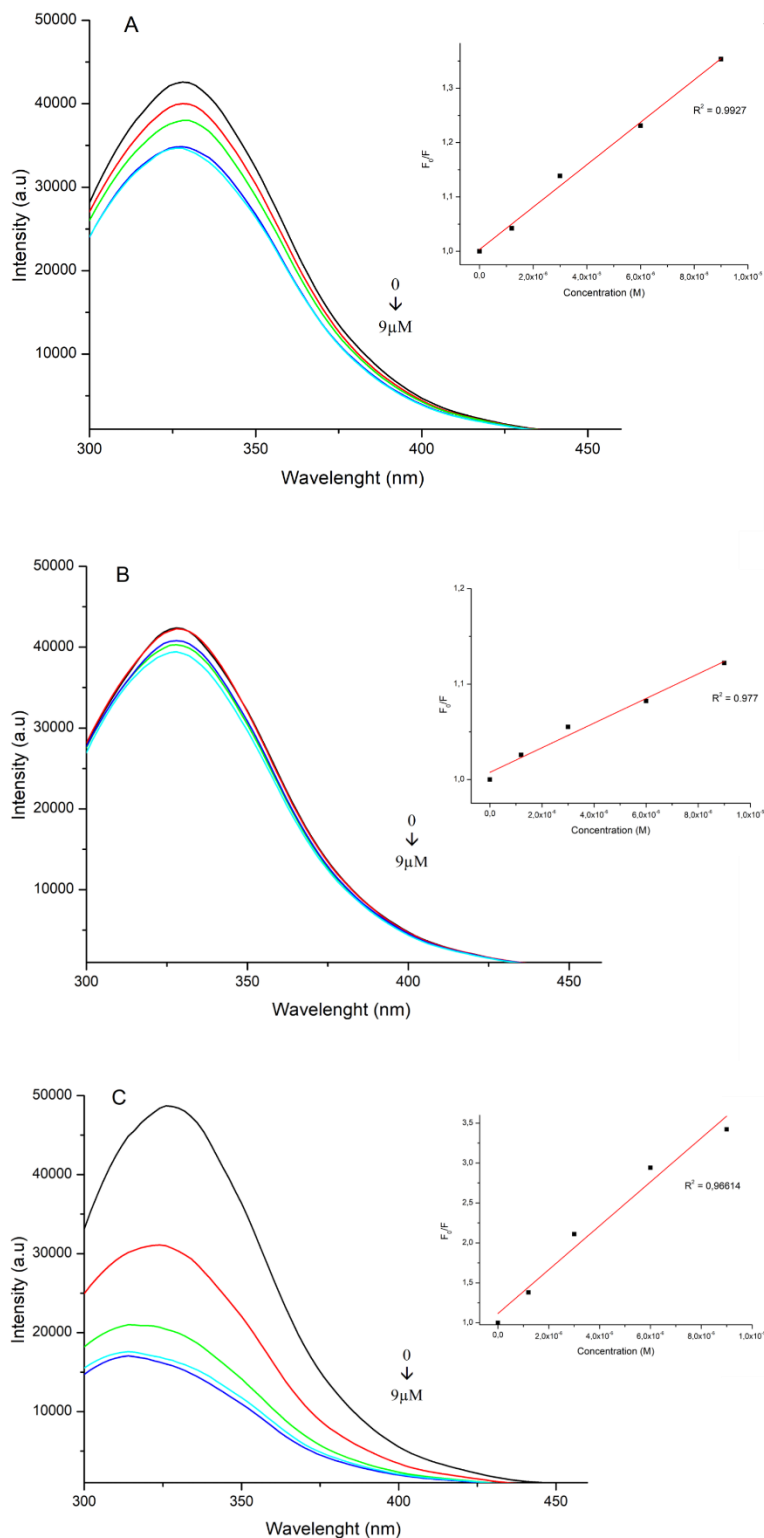

**Fig. S2** Emission spectra of HSA in the presence of various concentrations and Stern-Volmer plots of  $F_0/F$  against concentration of (A) BrCl-F-Lipo (B) Lipo and (C) BrCl-F. Control is marked black and consecutive spectra of the studied compounds (marked color) are in the following concentrations 1.2, 3, 6 and 9  $\mu\text{M}$ ,  $\lambda_{\text{ex}} = 280 \text{ nm}$ ,  $T = 295 \text{ K}$ . Spectra smoothed with SG 15 (see Method).

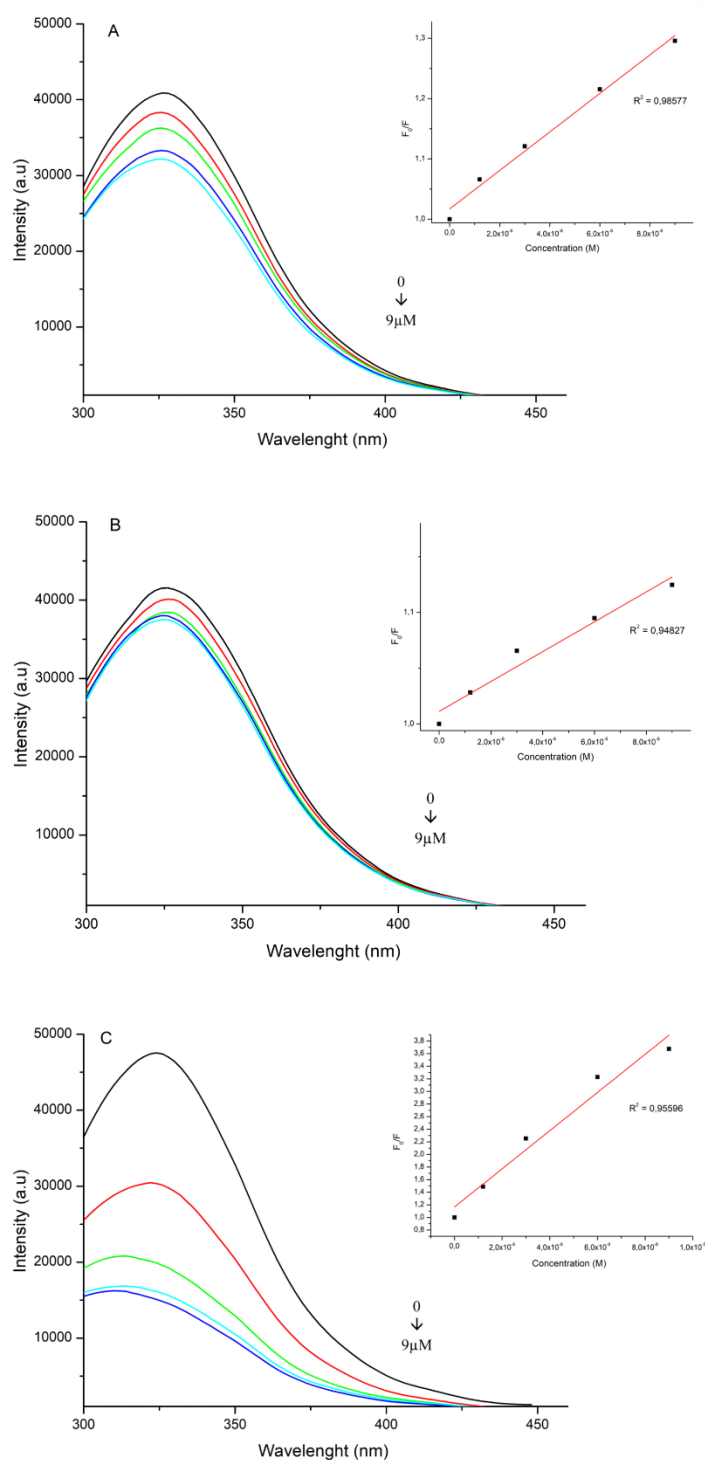

**Fig. S3** Emission spectra of HSA in the presence of various concentrations and Stern-Volmer plots of  $F_0/F$  against concentration of (A) BrCl-F-Lipo (B) Lipo and (C) BrCl-F. Control is marked black and consecutive spectra of the studied compounds (marked color) are in the following concentrations 1.2, 3, 6 and 9  $\mu$ M,  $\lambda_{ex} = 280$  nm,  $T = 300$  K. Spectra smoothed with SG 15 (see Method).

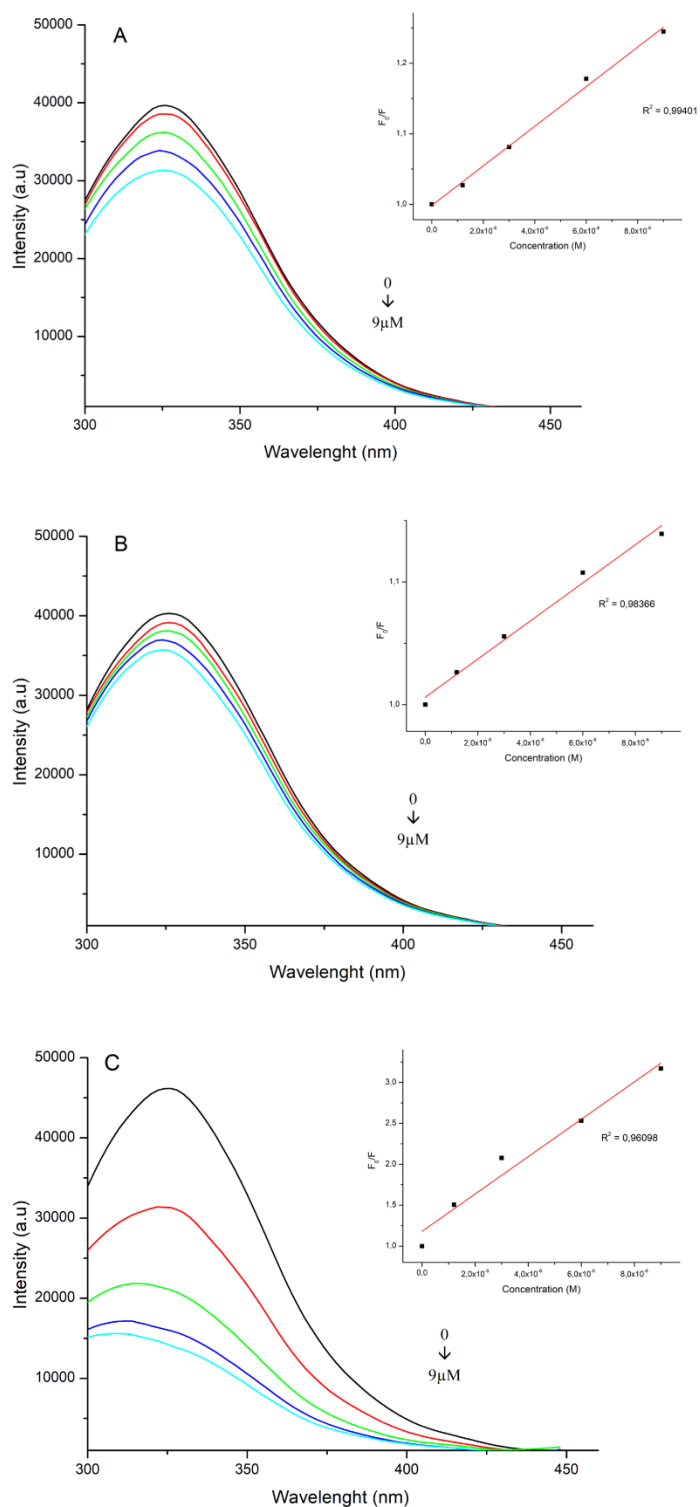

**Fig. S4** Emission spectra of HSA in the presence of various concentrations and Stern-Volmer plots of  $F_0/F$  against concentration of (A) BrCl-F-Lipo (B) Lipo and (C) BrCl-F Control is marked black and consecutive spectra of the studied compounds (marked color) are in the following concentrations 1.2, 3, 6 and 9  $\mu$ M,  $\lambda_{ex} = 280$  nm,  $T = 305$  K. Spectra smoothed with SG 15 (see Method).

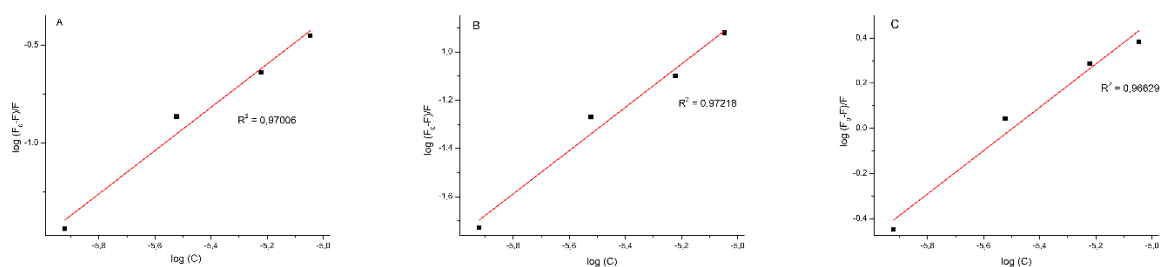

**Fig.S5** The plots of  $\log(F_0 - F)/F$  versus  $\log[c]$  of (A) BrCl-F-Lipo (B) Lipo and (C) BrCl-F at 295 K obtained from HSA fluorescence quenching.

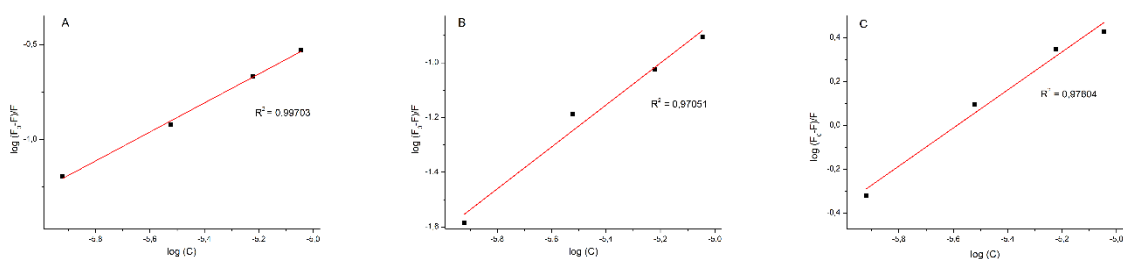

**Fig.S6** The plots of  $\log(F_0 - F)/F$  versus  $\log[c]$  of (A) BrCl-F-Lipo (B) Lipo and (C) BrCl-F at 300 K obtained from HSA fluorescence quenching.

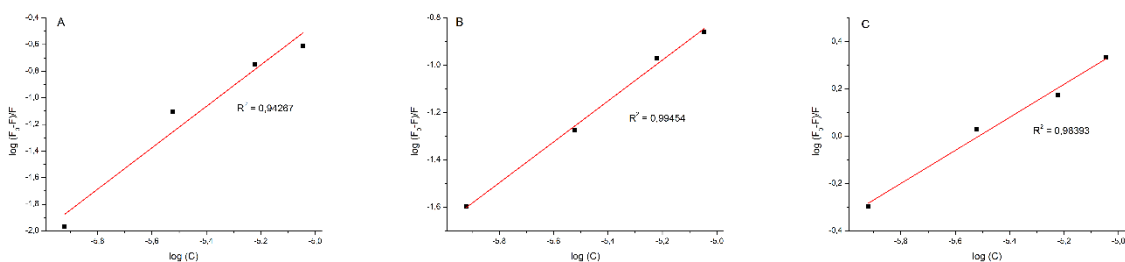

**Fig.S7** The plots of  $\log(F_0 - F)/F$  versus  $\log[c]$  of (A) BrCl-F-Lipo (B) Lipo and (C) BrCl-F at 305 K obtained from HSA fluorescence quenching.

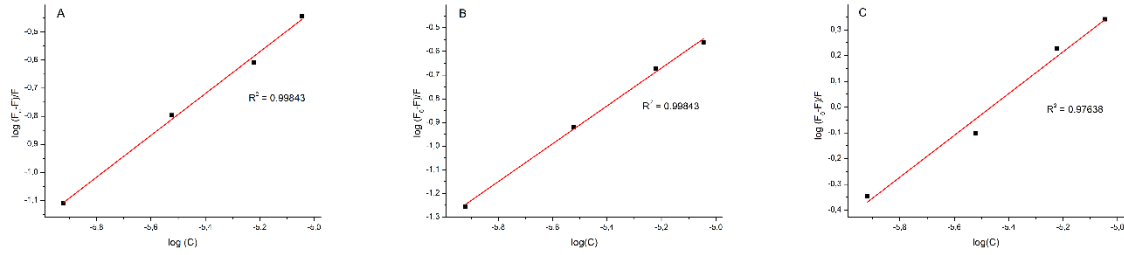

**Fig.S8** The plots of  $\log(F_0 - F)/F$  versus  $\log[c]$  of (A) BrCl-F-Lipo (B) Lipo and (C) BrCl-F at 310 K obtained from HSA fluorescence quenching.

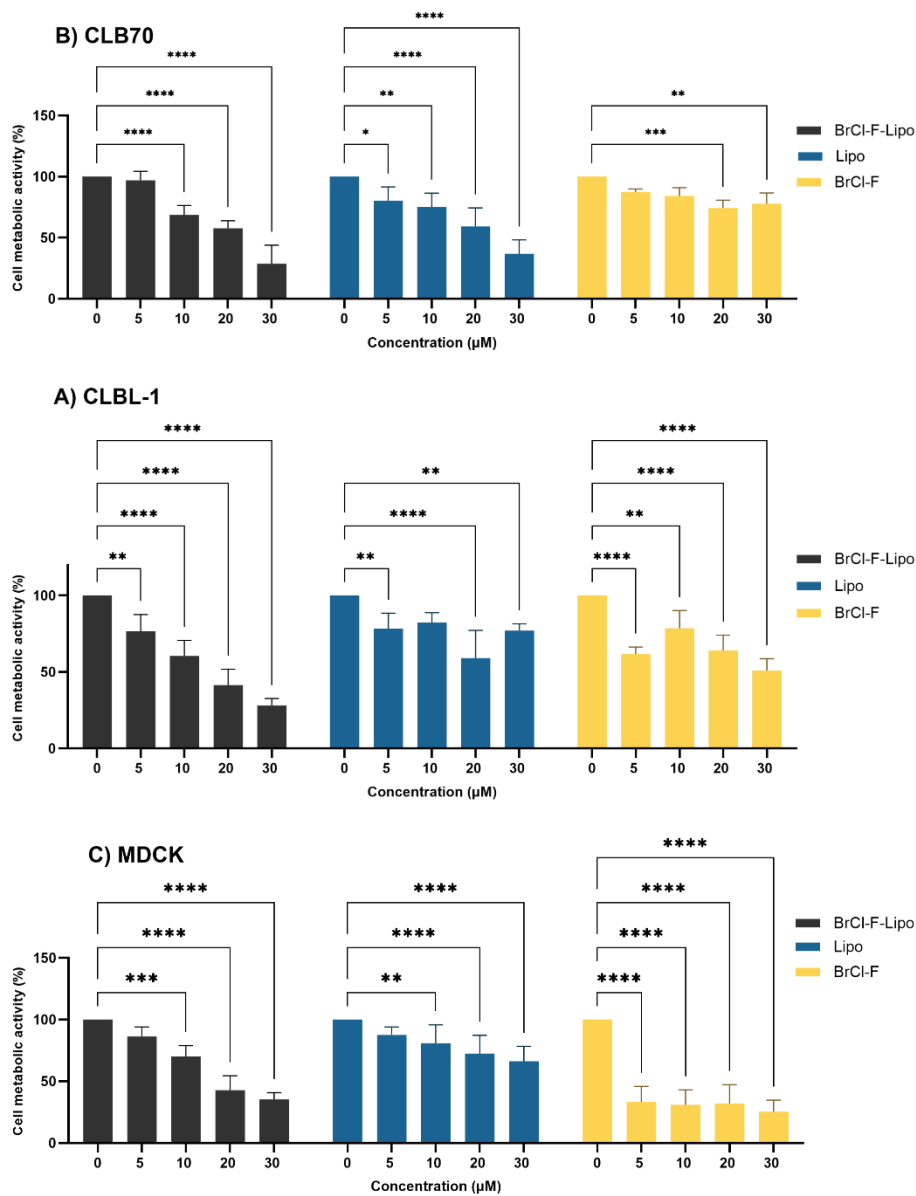

**Figure S9.** Effects of encapsulated BrCl-F (BrCl-F-Lipo), empty liposomes (Lipo) and 8-bromo-6-chloroflavone (BrCl-F) on metabolic activity in CLBL-1 (A), CLB70 (B) and MDCK (C) cell lines. Cells were treated with increasing concentrations (5–30  $\mu$ M) of the tested compounds for 48 h, and metabolic activity was measured by the MTT assay. Data are expressed as mean  $\pm$  SD from four independent experiments. Statistical significance vs. control: \* $p < 0.05$ ; \*\* $p < 0.01$ ; \*\*\* $p < 0.001$ ; \*\*\*\* $p < 0.0001$ .

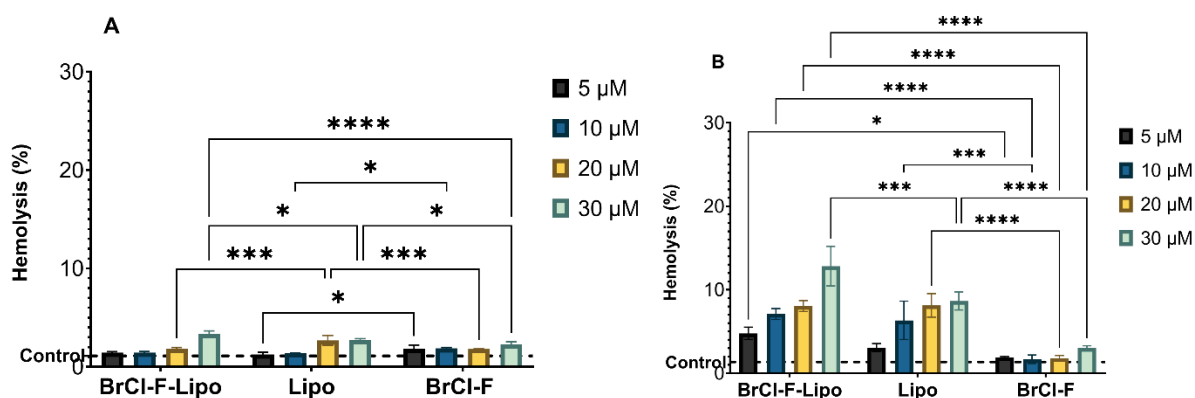

**Figure S10.** Percentage of hemolysis after 1 h (A) and 24 h (B) in the presence of the encapsulated BrCl-F (BrCl-F-Lipo), empty liposomes (Lipo) and 8-bromo-6-chloroflavone (BrCl-F). Data are expressed as mean  $\pm$  SD from three independent experiments. Statistical significance vs. control: \* $p < 0.05$ ; \*\* $p < 0.01$ ; \*\*\* $p < 0.001$ ; \*\*\*\* $p < 0.0001$ .
